# Supplementary material for: A mathematical model of the dynamics of prion aggregates with chaperone-mediated fragmentation
Source: PubMed Central journal article supplement (PMC4823377; doi:10.1007/s00285-015-0921-0), 2015-08-22
Supplement: 285_2015_921_MOESM1_ESM.pdf [file 285_2015_921_MOESM1_ESM.pdf]

# Supplemental Materials

Jason K. Davis      Suzanne S. Sindi

## 1 Derivation of ELNPM

### 1.1 Full Model

We examine the full kinetics implied by the rate equations in Section 2.2, where we consider each possible configuration of bound Hsp104 separately. We define  $u_{i(b)}$  to be the density of aggregates of size  $i$  with Hsp104 configuration  $b$ , where  $0 \leq b < 2^{i-1}$  and  $b$ 's binary expansion is taken to reflect the states of possible fragmentation sites: a 0 appearing in the location of an unbound site, and a 1 in the location of a bound site. Let  $c_b$  denote the Hamming weight of  $b$ , or the number of 1's appearing in the binary expansion of  $b$ . Finally, we assume that fragmentation occurs at a rate proportional to the amount of bound Hsp104 and that the resulting daughters are uniformly distributed amongst the possible configurations. Thus, for  $u_{i(b)}$ , fragmentation occurs with rate  $\gamma c_b$  into daughter aggregates with probability  $1/c_b$ . Finally, let  $b_1 \otimes b_2$  denote the bit-wise and of integers  $b_1$  and  $b_2$  and  $\delta(x) = 1$  if  $x = 0$  and 1 otherwise. Then,

$$\begin{aligned} \frac{du_{m(b)}}{dt} = & -2\beta s(t)u_{m(b)} + \beta s(t) \left[ u_{m-1,(b)}\delta(b \otimes 2^{m-2}) + u_{m-1,(b/2)}\delta(b \otimes 1) \right] - (\gamma c_b + \mu_0)u_{m(b)} \\ & + \gamma \sum_{i=m+1}^{\infty} \sum_{k=0}^{2^{i-m-1}-1} \left[ u_{i(b+2^{m-1}+2^m k)} + u_{i(k+2^{i-m-1}+2^{i-m}b)} \right] \\ & - k_{\text{on}}h(t) \left[ (m-1-c_b)u_{m(b)} - \sum_{\substack{b' \text{ s.t.} \\ c_{b'}=c_b-1 \\ b' \otimes b=b'}} u_{m(b')} \right] + k_{\text{off}} \left[ \sum_{\substack{b' \text{ s.t.} \\ c_{b'}=c_b+1 \\ b' \otimes b=b}} u_{m(b')} - c_b u_{m(b)} \right]. \end{aligned} \quad (1)$$

We now sum over every  $b < 2^{i-1}$  such that  $c_b = j$ , only assuming symmetry in the aggregate configuration densities ( $u_{i(b)} = u_{i(b')}$  where  $b'$  is the reversed bitstring of  $b$ ). We write  $u_{mn} = \sum_{b \text{ s.t. } c_b=n} u_{m(b)}$  and carefully count bitstrings

and simplify to obtain

$$\begin{aligned}
\frac{du_{mn}}{dt} &= -2\beta s(t) [u_{mn} - u_{m-1,n}] - (\gamma n + \mu_0)u_{mn} \\
&+ 2\gamma \sum_{i=m+1}^{\infty} \sum_{j=n+1}^{i-(m-n)} \sum_{\substack{b \text{ s.t.} \\ b < 2^{m-1} \\ c_b = n}} \sum_{\substack{b' \text{ s.t.} \\ b' < 2^{i-m-1} \\ c_{b'} = j-n-1}} u_{i(b+2^{m-1}+2^m b')} \\
&- k_{\text{on}} h(t) [(m-n-1)u_{mn} - (m-n)u_{m,n-1}] + k_{\text{off}} [(n+1)u_{m,n+1} - nu_{mn}].
\end{aligned} \tag{2}$$

We simplify the remaining recovery term with a claim: since conversion effectively biases Hsp104 configurations towards the center of the aggregate, a relatively fast enzyme off-binding will restore the configuration distribution to approximate uniformity. Let us proceed by formally assuming  $u_{i(j)} = u_{i(j')}$  if  $c_j = c_{j'}$ . Then (2) reduces to

$$\begin{aligned}
\frac{du_{mn}}{dt} &= -2\beta s(t) [u_{mn} - u_{m-1,n}] - (\gamma n + \mu_0)u_{mn} + 2\gamma \sum_{i=m+1}^{\infty} \sum_{j=n+1}^{i-(m-n)} \frac{\binom{m-1}{n} \binom{i-m-1}{j-n-1}}{\binom{i-1}{j}} u_{ij} \\
&- k_{\text{on}} h(t) [(m-n-1)u_{mn} - (m-n)u_{m,n-1}] + k_{\text{off}} [(n+1)u_{m,n+1} - nu_{mn}].
\end{aligned} \tag{3}$$

## 1.2 Reduced Equations

Equipped with these assumptions, let us define the moments of our aggregate density:

$$\eta = \sum_{i=n_0}^{\infty} \sum_{j=0}^{i-1} u_{ij}, \quad z = \sum_{i=n_0}^{\infty} \sum_{j=0}^{i-1} i u_{ij}, \quad z_b = \sum_{i=n_0}^{\infty} \sum_{j=0}^{i-1} j u_{ij}. \tag{4}$$

Then,

$$\frac{ds}{dt} = \alpha_s - \mu_s s(t) - 2\beta s(t)\eta(t) + \gamma(n_0 - 1)n_0 \sum_{i=n_0}^{\infty} \sum_{j=1}^{i-1} \frac{j}{i-1} u_{ij}(t) \quad (5)$$

$$\begin{aligned} \frac{dh}{dt} = & \alpha_h - \mu_h h(t) - k_{\text{on}} h(t)[z(t) - \eta(t) - z_b(t)] + (k_{\text{off}} + \gamma)z_b(t) \\ & + \gamma(n_0 - 1)(n_0 - 2) \sum_{i=n_0}^{\infty} \sum_{j=1}^{i-1} \frac{j(j-1)}{(i-1)(i-2)} u_{ij}(t) \end{aligned} \quad (6)$$

$$\frac{d\eta}{dt} = -\mu_0 \eta(t) + \gamma z_b(t) - 2\gamma(n_0 - 1) \sum_{i=n_0}^{\infty} \sum_{j=0}^{i-1} \frac{j}{i-1} u_{ij}(t) \quad (7)$$

$$\frac{dz}{dt} = 2\beta s(t)\eta(t) - \mu_0 z(t) - \gamma(n_0 - 1)n_0 \sum_{i=n_0}^{\infty} \sum_{j=0}^{i-1} \frac{j}{i-1} u_{ij}(t) \quad (8)$$

$$\begin{aligned} \frac{dz_b}{dt} = & -(\mu_0 + \gamma + k_{\text{off}})z_b(t) + k_{\text{on}} h(t)[z(t) - \eta(t) - z_b(t)] \\ & - \gamma(n_0 - 1)(n_0 - 2) \sum_{i=n_0}^{\infty} \sum_{j=1}^{i-1} \frac{j(j-1)}{(i-1)(i-2)} u_{ij}(t) \end{aligned} \quad (9)$$

While simplified, we still lack moment-closure. However, we note that the unclosed terms are of a very particular form, motivating a discrete transformation of  $u_{ij}$ . Define

$$v_{mn} = \sum_{j=n}^{m-1} \frac{\binom{j}{n}}{\binom{m-1}{n}} u_{mj}. \quad (10)$$

Then,

$$v_{i,0} = \sum_{j=0}^{i-1} u_{ij}, \quad v_{i,1} = \sum_{j=1}^{i-1} \frac{j}{i-1} u_{ij}, \quad v_{i,2} = \sum_{j=2}^{i-1} \frac{j(j-1)}{(i-1)(i-2)} u_{ij}, \quad (11)$$

and more generally,

$$\begin{aligned} \frac{dv_{mn}}{dt} = & -2\beta s(t) \left[ v_{mn}(t) - \left(1 - \frac{n}{m-1}\right) v_{m-1,n} \right] - \mu_0 v_{mn}(t) \\ & - \gamma(m-n-1)v_{m,n+1}(t) + 2\gamma \sum_{i=m+1}^{\infty} v_{i,n+1}(t) \\ & - n [(k_{\text{on}} h(t) + k_{\text{off}} + \gamma)v_{mn}(t) - k_{\text{on}} h(t)v_{m,n-1}(t)]. \end{aligned} \quad (12)$$

This recurrence is 2nd order in  $n$ , so we see that it is ill-posed. We can argue 1 boundary condition without additional assumptions: since  $v_{m,n+1} \leq v_{mn}$  by construction, and prion aggregates biologically must have an upper size limit, we have  $\lim_{n \rightarrow \infty} v_{mn} = 0$ . We are now left to find 1 more condition to make the problem well-posed.

### 1.3 Approximation

We perform the same non-dimensionalization as in Equations (16a)-(16e), writing again  $\omega(t) = z(t)/\eta(t) - n_0$  and  $p(t) = z_b(t)/[z(t) - \eta(t)]$ :

$$s' = A_s(1 - s) - Bs\eta + (n_0 - 1)n_0 \sum_{i=n_0}^{\infty} v_{i,1} \quad (13)$$

$$h' = A_h(1 - h) + r \left[ (\omega + n_0 - 1)(k_{-1}p - k_1h[1 - p])\eta + (n_0 - 2)(n_0 - 1) \sum_{i=n_0}^{\infty} v_{i,2} \right] \quad (14)$$

$$\eta' = (-A_0 + p(\omega + n_0 - 1))\eta - 2(n_0 - 1) \sum_{i=n_0}^{\infty} v_{i,1} \quad (15)$$

$$\omega' = Bs - p(\omega + 1)\omega + (n_0 - 1)(2\omega + n_0) \left( \frac{1}{\eta} \sum_{i=n_0}^{\infty} v_{i,1} - p \right) \quad (16)$$

$$p' = k_1h(1 - p) - k_{-1}p + p^2 - \frac{Bsp}{\omega + n_0 - 1} + \frac{(n_0 - 1)(n_0 - 2)}{p\eta(\omega + n_0 - 1)} \left( p \sum_{i=n_0}^{\infty} v_{i,1} - \sum_{i=n_0}^{\infty} v_{i,2} \right). \quad (17)$$

Written in this way, it becomes clear that enforcing  $\sum_{i=n_0}^{\infty} v_{i,n+1} = p \sum_{i=n_0}^{\infty} v_{i,n}$  will yield moment closure. Interpreting  $u_{ij}/\eta$  as a probability mass and  $(I, J)$  as a joint random variable modeling aggregate size and bound Hsp104, we write  $p = \mathbb{E}[J]/\mathbb{E}[I - 1]$  and ultimately understand the nature of our approximation to be the validity of the approximations

$$\mathbb{E} \left[ \frac{J}{I - 1} \right] \approx \frac{\mathbb{E}[J]}{\mathbb{E}[I - 1]}, \quad (18)$$

and

$$\mathbb{E} \left[ \frac{J(J - 1)}{(I - 1)(I - 2)} \right] \approx \left( \frac{\mathbb{E}[J]}{\mathbb{E}[I - 1]} \right)^2. \quad (19)$$

Consider the 2nd order Taylor expansion of an arbitrary function  $f(x, y)$  about  $(\bar{x}, \bar{y})$ :

$$\begin{aligned} f(x, y) &\approx f(\bar{x}, \bar{y}) + (x - \bar{x})f_x(\bar{x}, \bar{y}) + (y - \bar{y})f_y(\bar{x}, \bar{y}) \\ &\quad + \frac{1}{2} [(x - \bar{x})^2 f_{xx}(\bar{x}, \bar{y}) + 2(x - \bar{x})(y - \bar{y})f_{xy}(\bar{x}, \bar{y}) + (y - \bar{y})^2 f_{yy}(\bar{x}, \bar{y})] \end{aligned} \quad (20)$$

Treating  $X$  and  $Y$  as random variables and  $\bar{x}$  and  $\bar{y}$  as their means, then

$$\mathbb{E}[f(X, Y)] \approx f(\bar{x}, \bar{y}) + \frac{1}{2} (f_{xx}(\bar{x}, \bar{y})\text{Var}[X] + 2f_{xy}(\bar{x}, \bar{y})\text{Cov}[X, Y] + f_{yy}(\bar{x}, \bar{y})\text{Var}[Y]). \quad (21)$$

In our case  $X = J$ ,  $\bar{x} = z_b/\eta$ , and  $Y = I - 1$ ,  $\bar{y} = z/\eta - 1$ . Let  $\bar{u} = z/\eta$ ; for Approximation (18), we have  $f(x, y) = x/y$  and

$$\mathbb{E} \left[ \frac{J}{I - 1} \right] = p + \frac{1}{\bar{u}^2} (p\text{Var}[I - 1] - \text{Cov}[J, I - 1]) + O(1/\bar{u}^3). \quad (22)$$

For Approximation (19), we have  $f(x, y) = \frac{x(x-1)}{y(y-1)}$  and

$$\mathbb{E} \left[ \frac{J(J-1)}{(I-1)(I-2)} \right] = p^2 - \frac{p(1-p)}{\bar{u}} + \frac{\text{Var}[J] - 4p\text{Cov}[J, I-1] + 3p^2\text{Var}[I-1] - 2p(1-p)}{\bar{u}^2} + O(1/\bar{u}^3). \quad (23)$$

Assuming the variances are dominated by the average aggregate size, we have error terms in the first approximation of  $O(1/\bar{u}^2)$  and  $O(1/\bar{u})$  in the second; when multiplied against the terms' coefficients, we obtain  $O(1/\bar{u}^2)$  in either case.
